# Supplementary material
Source: PubMed Central journal article supplement (PMC2625308)
Supplement: NIHMS58387-supplement-1.pdf [file NIHMS58387-supplement-1.pdf]

Supplementary Figure S1: Hydrated  $\text{Ca}^{+2}$  ions bound to the  $\text{N}^{13}\text{C}$ -ethyl- $\text{N}^{13}\text{C}$  crosslinked DNA.  $\text{Ca}^{+2}$  ions and their water ligands are shown as sphere representations, respectively colored deep pink and light blue. Symmetry related  $\text{Ca}^{+2}$  ions and their water ligands are respectively colored light pink and grey. Lines indicate  $\text{Ca}^{+2}$ -water ligands or hydrogen bonds with DNA atoms. (a) Calcium 111. (b) Calcium 113. (c) Calcium 114.
