# Supplementary material
Source: PubMed Central journal article supplement (PMC2625308)

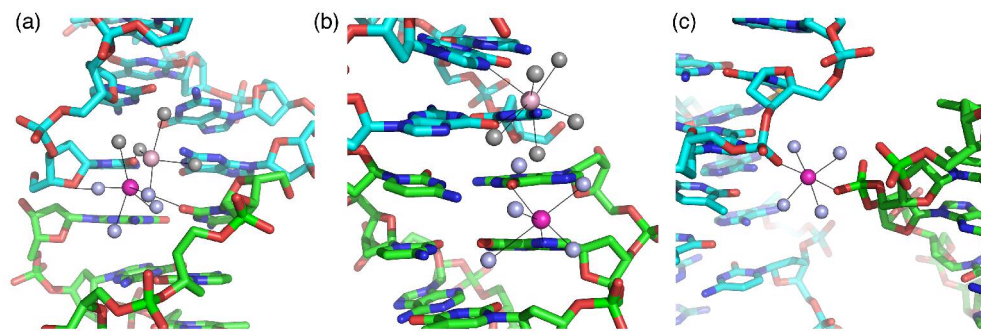

Supplement: NIHMS58387-supplement-2.pdf [file NIHMS58387-supplement-2.pdf]
